# Supplementary material for: Water-dispersible multifunctional polyaniline-laponite-keggin iron nanocomposites through a template approach
Source: Royal Society of Chemistry journal article supplement (doi:10.1039/c1jm13494a), 2011-01-01
Supplement: c1jm13494a.pdf [file c1jm13494a.pdf]

Manuscript ID JM-ART-03-2011-011276.R1

## Water dispersible multifunctional polyaniline- laponite-keggin iron nanocomposite through template approach

Janardhanan D.Sudha<sup>a</sup>, Andrij Pich<sup>b</sup>, Viswan L. Reena<sup>a</sup>, Sarojam Sivakala<sup>a</sup>,  
Hans-Juergen P. Adler<sup>c</sup>

<sup>a</sup>Chemical Sciences and Technology Division, National Institute for Interdisciplinary Science and Technology (NIIST),  
CSIR, Thiruvananthapuram 695 019, India.

<sup>b</sup>DWI RWTH Aachen University, Functional and Interactive Polymers, D-52056 Aachen, Germany.

<sup>c</sup>Department of Macromolecular Chemistry and Textile Chemistry, University of Technology, Dresden, Germany.

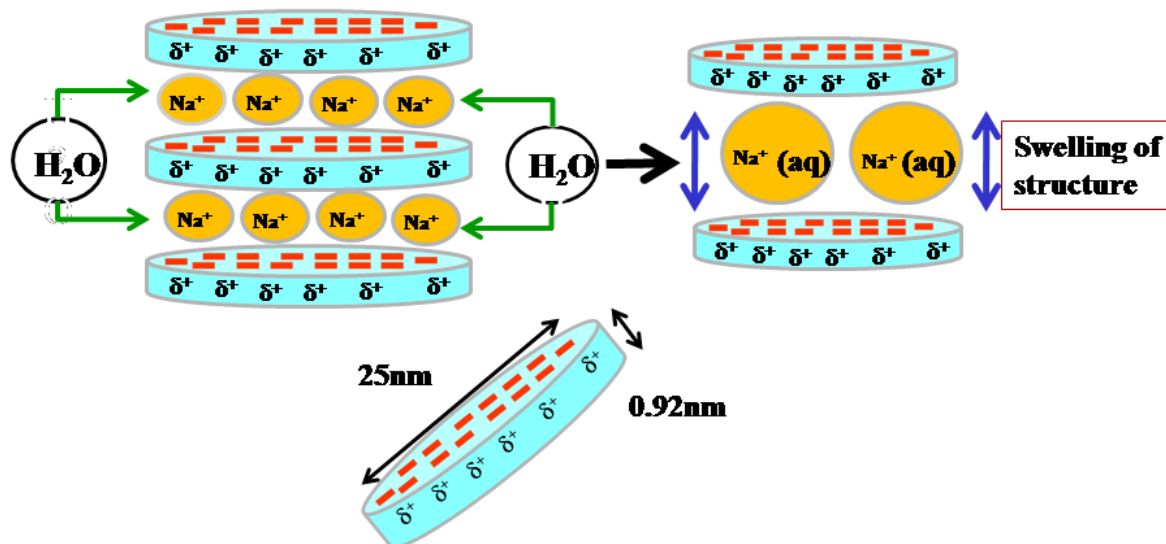

Fig 1S. Structure of laponite

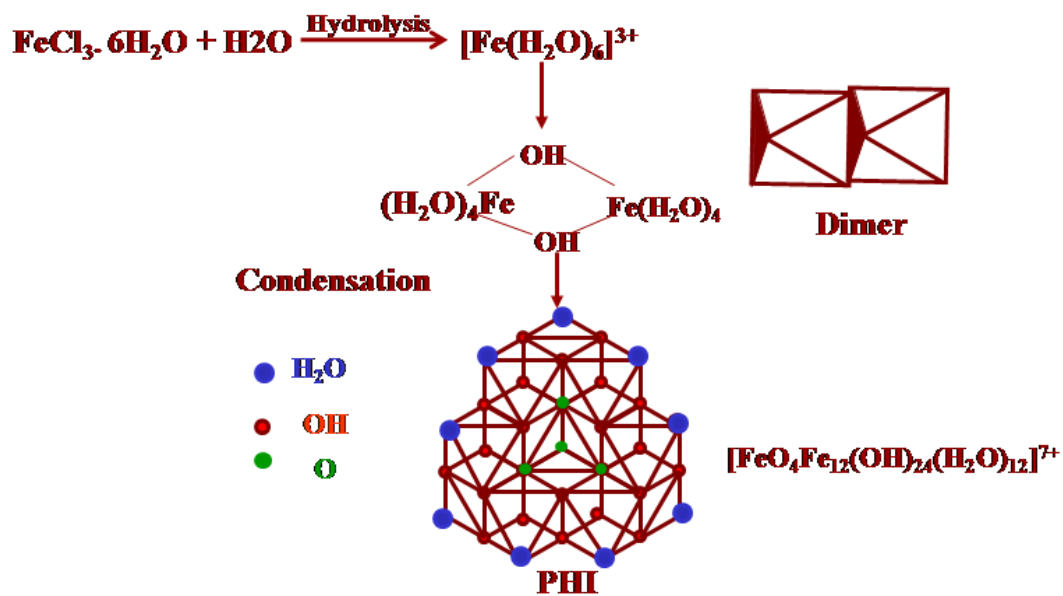

Scheme1S. The formation of PHI through the hydrolysis of ferric chloride

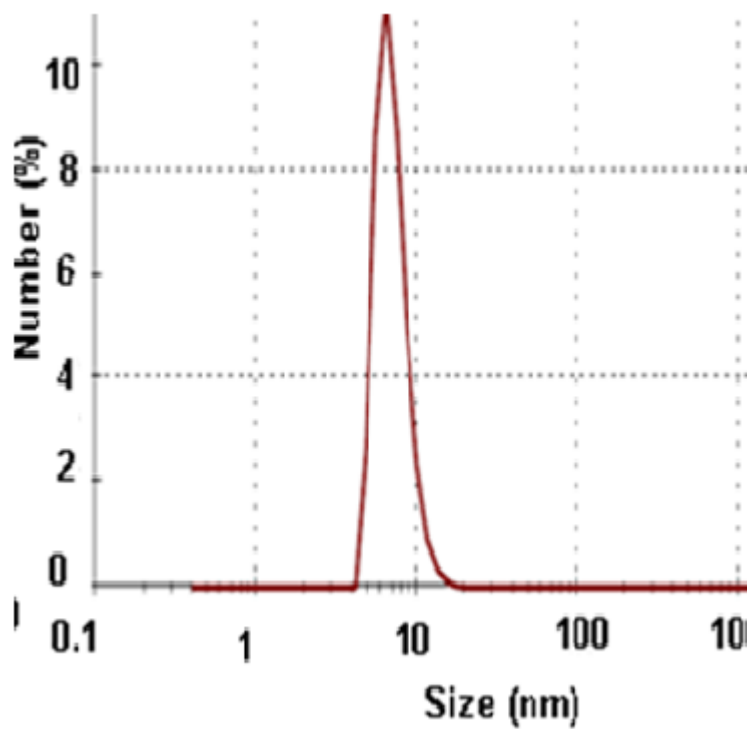

Fig 2S. DLS diagram showing the particle size measurement of PHI

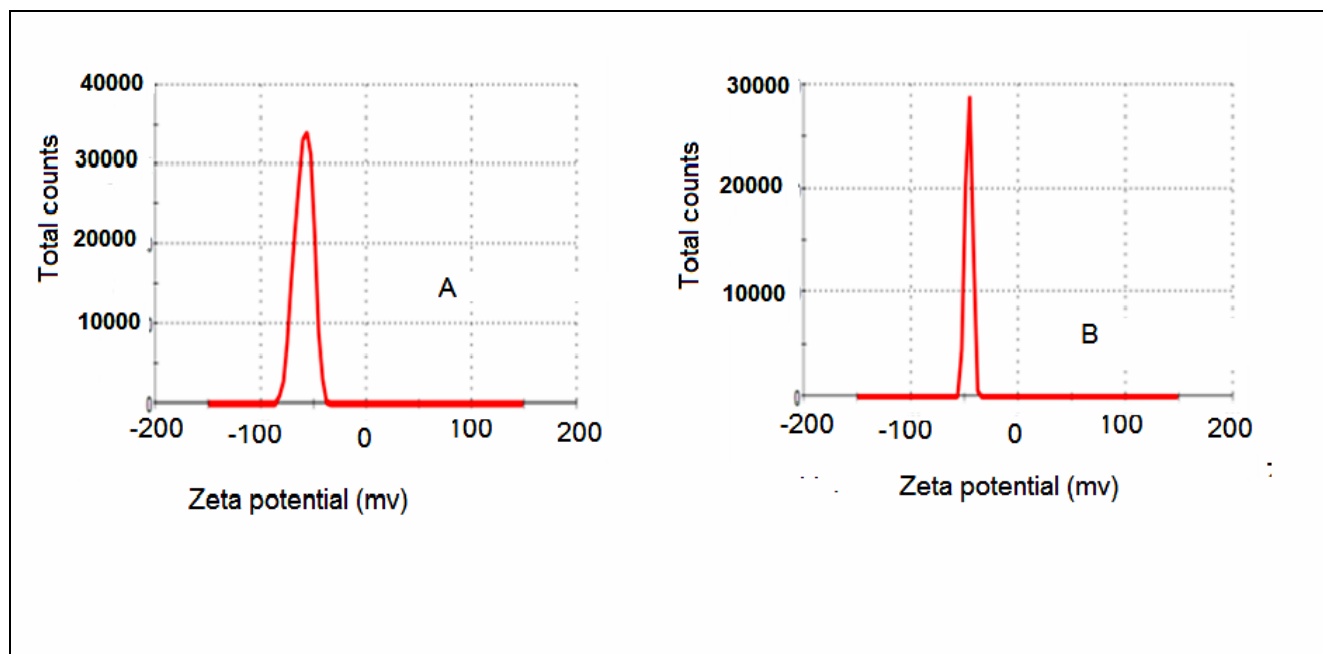

**Fig .3S. Diagram showing the zeta potential of laponite and PIL.**

**Table 1S. Experimental details**

| Sample | Anilinium hydrochloride, ( $\times 10^{-2}$ mol) | Wt of laponite $\times 10^{-1}$ (g) | Vol of PHI<br>PHI / laponite =<br>90 mmol/meq (ml) | Ammonium persulphate ( $\times 10^{-2}$ mol) |
|--------|--------------------------------------------------|-------------------------------------|----------------------------------------------------|----------------------------------------------|
| PPIL1  | 1                                                | 1                                   | 14.2                                               | 1.1                                          |
| PPIL2  | 2                                                | 1                                   | 14.2                                               | 2.2                                          |
| PPIL3  | 3                                                | 1                                   | 14.2                                               | 3.3                                          |
| PPIL4  | 4                                                | 1                                   | 14.2                                               | 4.4                                          |
| PPL    | 1                                                | 1                                   | 0                                                  | 1.1                                          |
| PPI    | 1                                                | 0                                   | 14.2                                               | 1.1                                          |
| PP     | 1                                                | 0                                   | 0                                                  | 1.1                                          |

**Table 2S. Experimental details and particle size of PPILs.**

| Sample | Particle size from DLS (nm) | PDI  |
|--------|-----------------------------|------|
| PPIL1  | 60                          | 0.77 |

|       |     |      |
|-------|-----|------|
| PPIL2 | 65  | 0.77 |
| PPIL3 | 75  | 0.85 |
| PPIL4 | 200 | 0.82 |

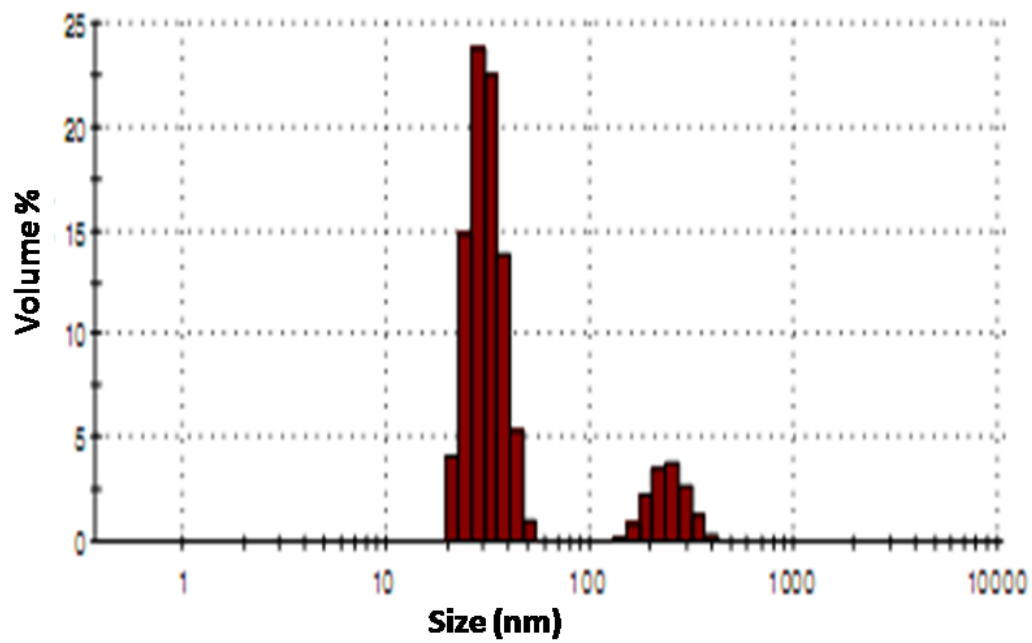

**Fig. 4S** Representative DLS histogram showing particle size of PPIL

**Table 3 S. Details of elemental analysis**

| Sample | Calculated ( % ) |      |      |      | Observed ( % ) |      |      |     |
|--------|------------------|------|------|------|----------------|------|------|-----|
|        | C                | H    | N    | Fe   | C              | H    | N    | Fe  |
| PPIL1  | 56.6             | 4.7  | 11.1 | 11.7 | 57.08          | 4.9  | 11.4 | 7.1 |
| PPIL2  | 65.73            | 5.4  | 12.7 | 6.6  | 66.9           | 5.5  | 12.9 | 5.2 |
| PPIL3  | 69.4             | 5.76 | 13.4 | 4.0  | 70.8           | 5.86 | 13.7 | 3.1 |
| PPIL4  | 70.6             | 5.87 | 13.7 | 3.5  | 71.3           | 6.01 | 14.0 | 2.4 |
| PP     | 78.2             | 6.5  | 15.2 | 0    | 75.1           | 5.34 | 14.3 | 0   |
| PPL    | 73               | 5.8  | 13.6 | 0    | 70.9           | 5.2  | 12.4 | 0   |

**Table 4S Details of XRD results**

| Sample                         | Diffraction Angle $2\theta$ (degrees)                          | d- spacing Å                                         |
|--------------------------------|----------------------------------------------------------------|------------------------------------------------------|
| Laponite                       | 6.51,19.84, 28.18, 35.27, 53.49, 60.83                         | 13.21, 4.35, 3.08, 2.47, 1.66, 1.48.                 |
| PIL                            | 5.9, 19.84,27.81, 31.78, 35.27, 53.49,9,60.83                  | 15.2, 3.01, 2.54, 2.09, 1.6, 1.69,1.49               |
| Fe <sub>3</sub> O <sub>4</sub> | 30.1, 35.42, 43.20, 53.48, 57.94                               | 2.97, 2.5, 2.09, 2.53, 2.97.                         |
| PPIL2                          | 19.84,25.1,27.3,31.78,34.89,43.67,49.19,51.21,<br>60.58 , 72.2 | 4.35,3.45, 3.18, 2.74, 2.5, 2.02,1.78,<br>1.73, 1.48 |

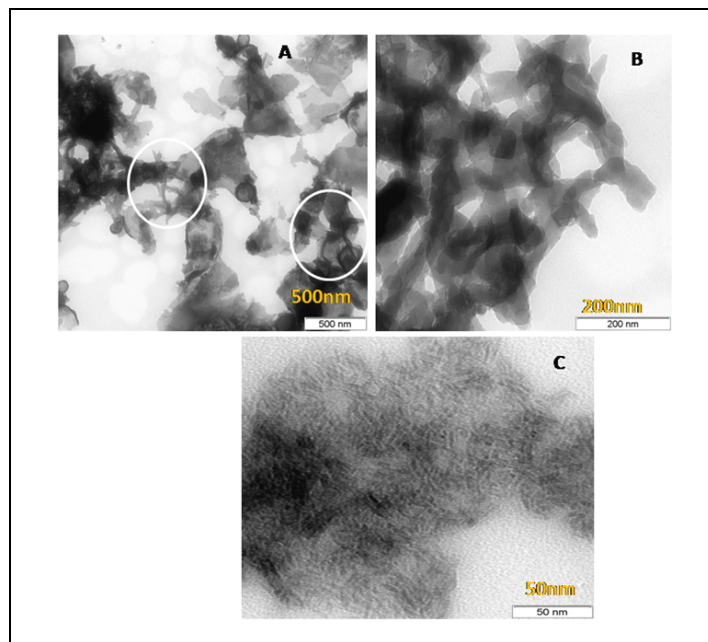

**Figure 5S : TEM images of A- PPIL2 B- PPIL4 and (C) PIL .**

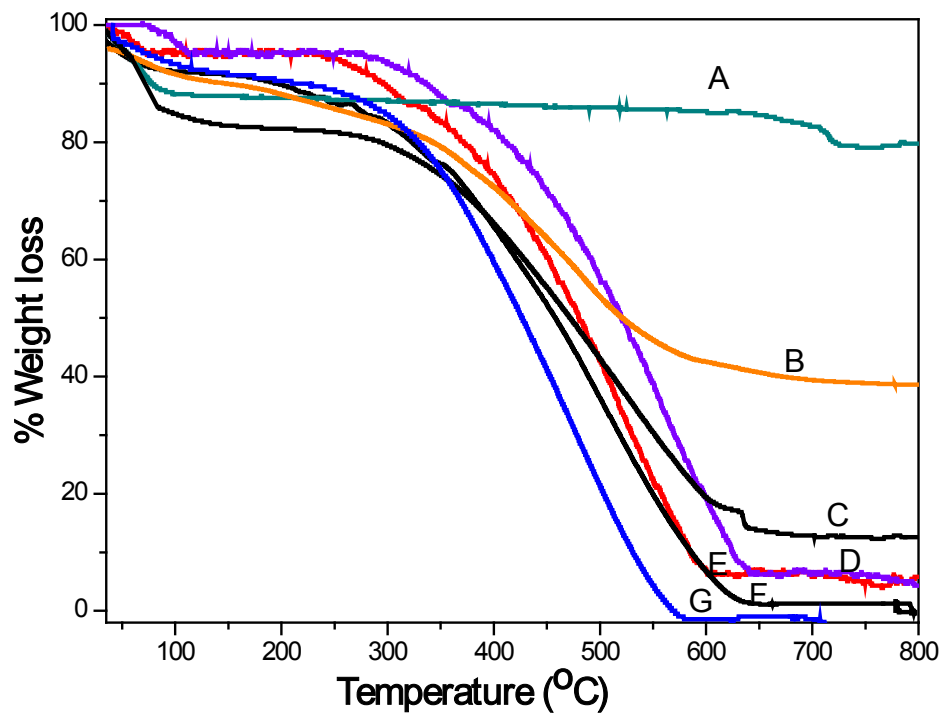

Fig. 6S. TGA curves for A- laponite, B- PPL, C-PPIL1, D-PPIL2, E-PPIL3, F PPIL4, G. PP

Table 5S. Details of weight loss during thermal decomposition

| Sample | Organic content(calc)<br>% | Char content<br>(calc) % | Char content from<br>TGA( wt %) | Organic content from<br>TGA( wt %) |
|--------|----------------------------|--------------------------|---------------------------------|------------------------------------|
| PPIL1  | 72.46                      | 27.45                    | 14.7%                           | 76.3                               |
| PPIL2  | 84.03                      | 14.2                     | 8.35                            | 87.15                              |
| PPIL3  | 88.75                      | 11.24                    | 4.75                            | 90.25                              |
| PPIL4  | 91.32                      | 8.65                     | 2.25                            | 95.75                              |



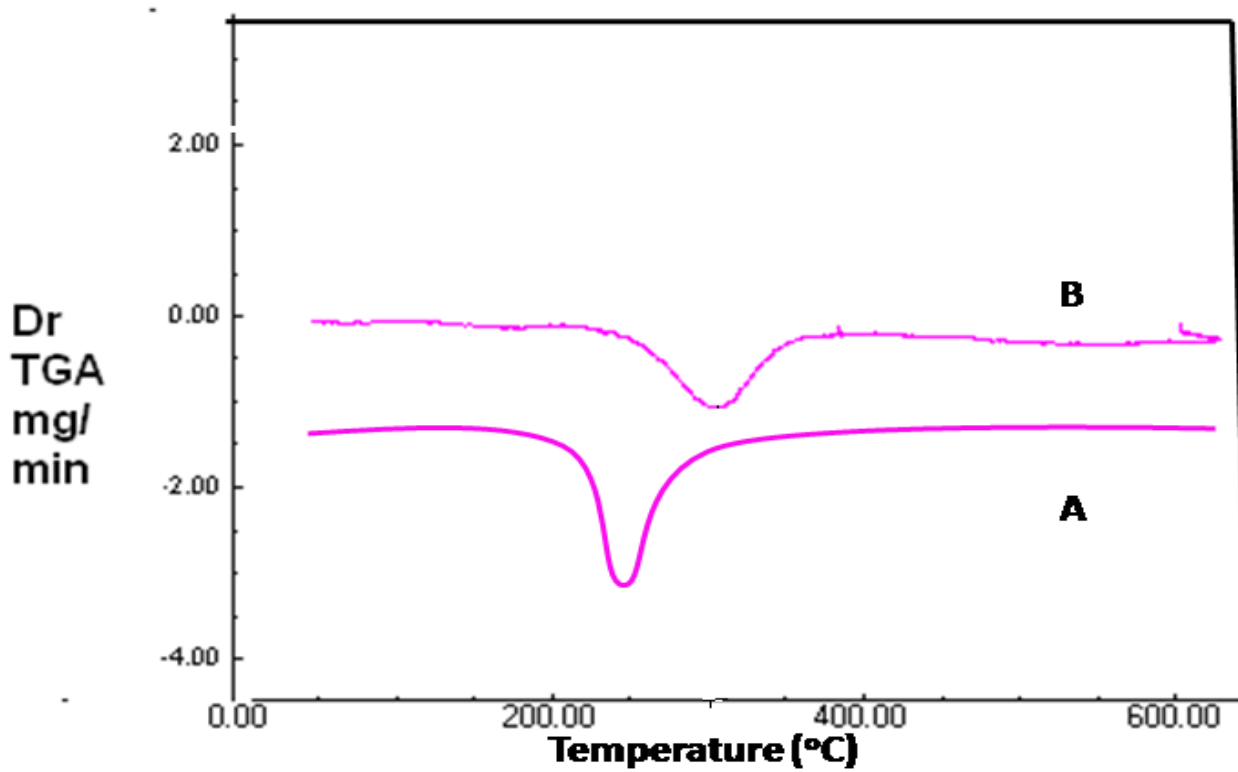

Fig. 7S DTG curves for A- PP and B- PPIL3

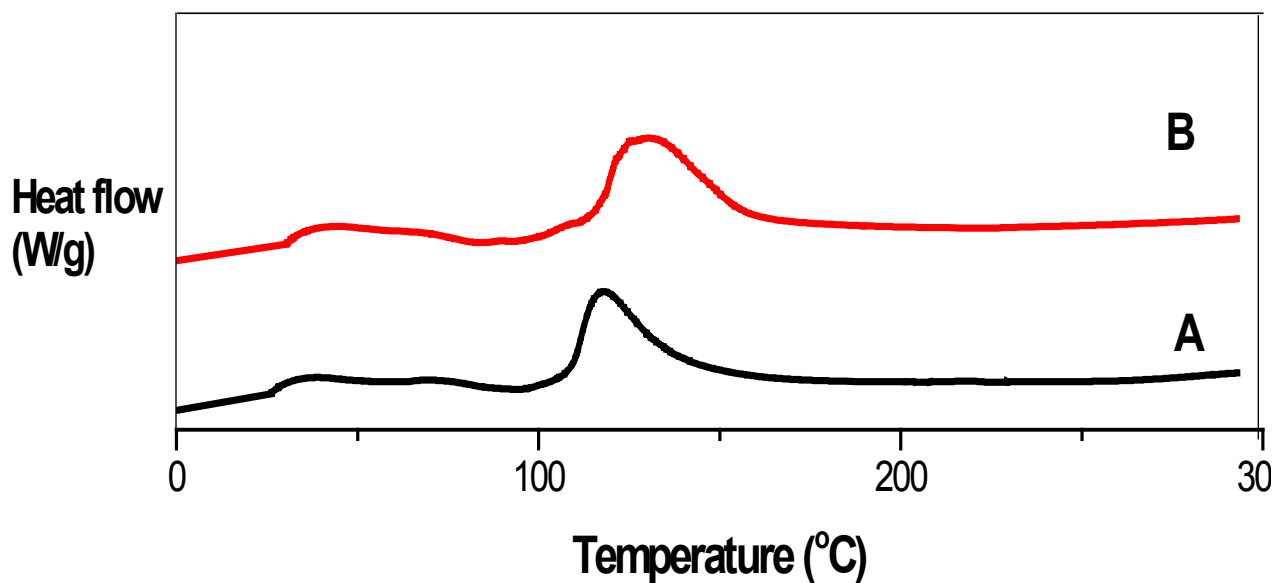

Fig. 8S DSC of A- PP, B- PPIL3

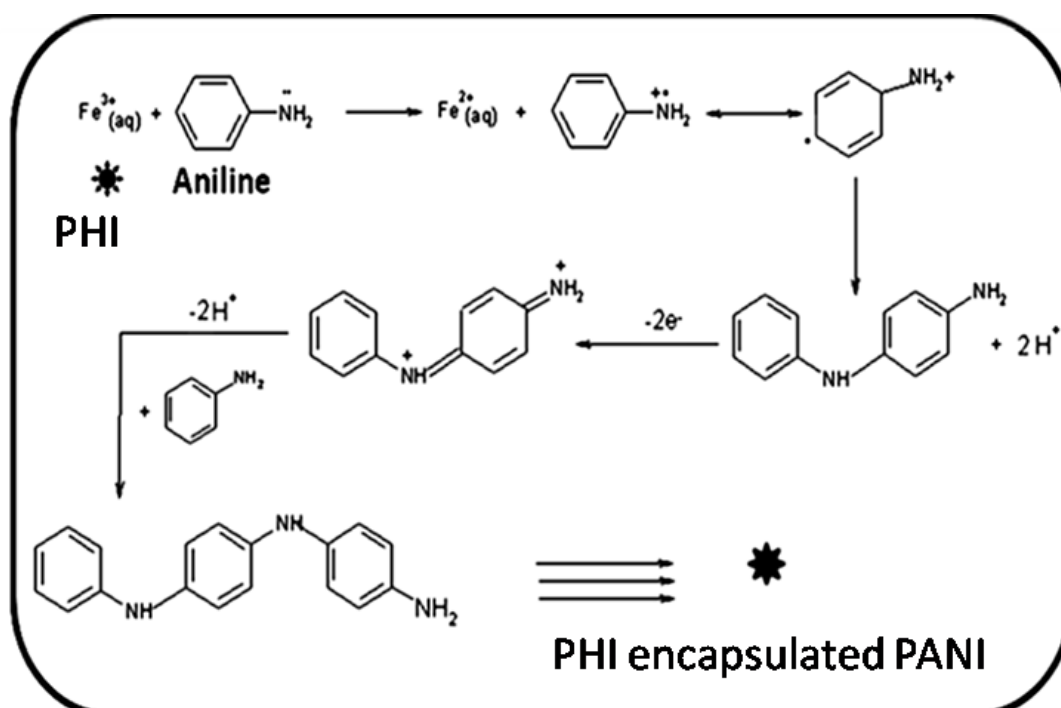

Scheme 2S. Mechanism showing the template role of PIL in the formation of PANI
